# Supplementary material
Source: Springer Nature journal article supplement (https://www.springermedizin.de/resource/supplementary/12913_2006_428_MOESM2_ESM.pdf/9535186)

9.0%

8.0%

7.0%

6.0%

5.0%

4.0%

3.0%

2.0%

1.0%

0.0%

2006

2011

2016

2021

2026

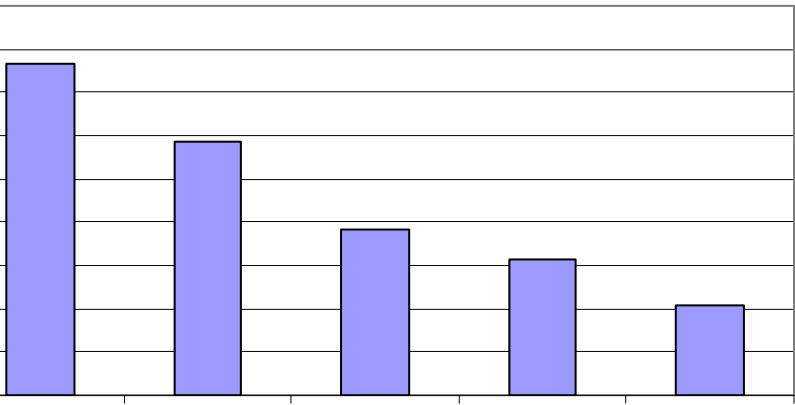

Supplement: MOESM2 [file 9535186]
